# Supplementary material for: Apical Sodium-Dependent Bile Acid Cotransporter, A Novel Transporter of Indocyanine Green, and Its Application in Drug Screening
Source: MDPI journal article supplement (doi:10.3390/ijms21062202), 2020-03-23
Supplement: s1 [file s1]

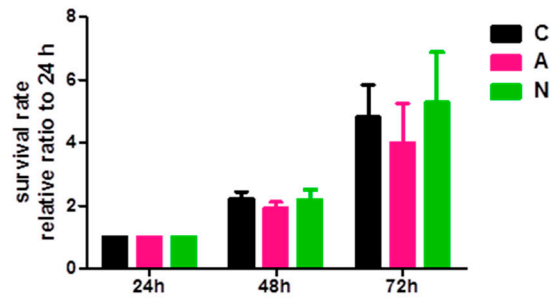

**Figure S1** The proliferation observed using the MTT assay in the control and cells expressing ASBT.
